# Supplementary material for: Dual membrane-spanning anti-sigma factors regulate vesiculation in Bacteroides thetaiotaomicron
Source: PubMed Central journal article supplement — Proc Natl Acad Sci U S A. 2024 Feb 29;121(10):e2321910121. doi: 10.1073/pnas.2321910121 (PMC10927553; doi:10.1073/pnas.2321910121), 2024-02-29
Supplement: pnas.2321910121.sapp.pdf [file pnas.2321910121.sapp.pdf]

## **Materials and Methods**

**RNA Sequencing Sample Collection, Library Preparation, and Analysis.** WT and  $\Delta dma1$  were grown overnight in BHI media before being diluted to the equivalent of OD 0.1 in 10 mL and grown anaerobically for 4 h at 37°C. Four individual overnight and 10-mL culture biological replicates were prepared. Cultures were normalized, and an amount of culture equivalent to an OD<sub>600</sub> of 4.0 was pelleted for 90s at 8,000 rpm. Pellets were resuspended on ice in 1 mL TRIzol (Invitrogen) with 10  $\mu$ L of 5 mg/mL glycogen. Samples were flash frozen and stored at -80°C until extraction. Prior to extraction, samples were thawed on ice, then pelleted, and supernatants were treated with chloroform. RNA was extracted from the aqueous phase using the RNeasy minikit (Qiagen, Inc.), and RNA quality was checked by agarose gel electrophoresis and  $A_{260}/A_{280}$  measurements. RNA was stored at -80°C with SUPERase-IN RNase inhibitor (Life Technologies) until library preparation.

RNA sequencing prep (RNA-Seq) was performed as previously describe<sup>1</sup>. Briefly, 400ng of total RNA from each sample was used for generating cDNA libraries following our RNAtag-Seq protocol. PCR amplified cDNA libraries were sequenced on an Illumina NextSeq500, obtaining a high-sequencing depth (over 7 million reads per sample). RNA-Seq data was analyzed using our *in-house* developed analysis pipeline *Aerobio*. Raw reads are demultiplexed by 5' and 3' indices, trimmed to 59 base pairs, and quality filtered (96% sequence quality>Q14). Filtered reads are mapped to the corresponding reference genomes using bowtie2 with the --very-sensitive option (-D 20 -R 3 -N 0 -L 20 -i S, 1, 0.50). Mapped reads are aggregated by feature Count and differential expression is calculated with DESeq2<sup>1</sup>. In each pair-wise differential expression comparison, significant differential expression is filtered based on two criteria:  $|\log_2\text{foldchange}| > 1$  and adjusted p-value (*padj*) <0.05. All differential expression (DE) comparisons are made between the WT and  $\Delta dma1$  mutants under the condition mentioned above. The reproducibility of the transcriptomic data was confirmed by an overall high Spearman correlation across biological replicates ( $R > 0.95$ ). BioProject ID PRJNA994135.

**Sample preparation for Proteomic analysis.** WT,  $\Delta das1$ ,  $\Delta dma1$ , and  $\Delta das1-dma1$  were grown overnight anaerobically in 2mL of BHI media prior to being diluted into 50 mL and grown for 20 h. Whole cells, total membranes, and vesicles were collected from each strain. Four individual biological replicates of each fraction were performed for each strain. Samples were lyophilized in preparation for MS analysis.

Lyophilized protein samples were solubilized in 4% SDS, 100mM Tris pH 8.5 by boiling them for 10 min at 95 °C. The protein concentrations were assessed using a bicinchoninic acid protein assay (Thermo Fisher Scientific) and 100 $\mu$ g of each biological replicate prepared for digestion using Micro S-traps (Protifi, USA) according to the manufacturer's instructions. Briefly, samples were reduced with 10mM DTT for 10 mins at 95°C and then alkylated with 40mM IAA in the dark for 1 hour. Samples were acidified to 1.2% phosphoric acid and diluted with seven volumes of S-trap wash buffer (90% methanol, 100mM Tetraethylammonium bromide pH 7.1) before being loaded onto S-traps and washed 3 times with S-trap wash buffer. Samples were then incubated with Trypsin (1:100 protease:protein ratio, in 100mM Tetraethylammonium bromide pH 8.5) overnight at 37°C before being collected by centrifugation with washes of 100mM Tetraethylammonium bromide pH 8.5, followed by 0.2% formic acid followed by 0.2% formic acid / 50% acetonitrile. Samples were then dried down and further cleaned up using homemade C18 Stage 1,2 tips to ensure the removal of any particulate matter.

**Reverse phase Liquid chromatography–mass spectrometry.** C18 purified digests were re-suspended in Buffer A\* (2% acetonitrile, 0.01% trifluoroacetic acid) and separated on a Ultimate 3000 UPLC (Thermo Fisher Scientific) with a two-column chromatography set up composed of a PepMap100 C18 20 mm x 75  $\mu$ m trap and a PepMap C18 500 mm x 75  $\mu$ m analytical column (Thermo Fisher Scientific). Digests were loaded on to the trap column at 5  $\mu$ L/min for 6 minutes with Buffer A (0.1% formic acid, 2% DMSO) then infused into a Orbitrap 480™ at 300 nl/minute via the analytical column. 95-minute runs were undertaken by altering the buffer composition from 2% Buffer B to 28% B over 70 minutes, then from 25% B to 40% B over 4 minutes, then from 40% B to 80% B over 3 minutes. The composition was held at 80% B for 2 minutes, and then dropped to 2% B over 1 minutes before being held at 2% B for another 10 minutes. The Orbitrap 480™ Mass Spectrometer was operated in a data-dependent mode automatically switching between the acquisition of a single Orbitrap MS scan (300-1600 m/z, maximal injection time of 25 ms, an AGC set to a maximum of 300% and a resolution of 120k) every 3 seconds and Orbitrap MS/MS HCD scans of precursors (using a stepped NCE of 28,32,40%,

maximal injection time of 80 ms, an AGC set to a maximum of 300% and a resolution of 30k). Identification and LFQ analysis were accomplished using MaxQuant (v1.6.17.0)<sup>3</sup>. Data was searched against the *B. thetaiotaomicron* reference proteome (Uniprot: UP000001414) allowing for oxidation on Methionine. The LFQ and “Match Between Run” options were enabled to allow comparison between samples. Maxquant search results were processed using Perseus (version 1.6.0.7) <sup>3</sup> with missing values imputed based on the total observed protein intensities with a range of 0.3  $\sigma$  and a downshift of 1.8  $\sigma$ . Statistical analysis was undertaken in Perseus using two-tailed unpaired T-tests between groups.

**Data availability.** The mass spectrometry proteomics data has been deposited in the Proteome Xchange accession: PXD043360.

**MS data analysis.** Identification and LFQ analysis were accomplished using Max-Quant (v2.0.2.0) <sup>8</sup> using *Bacteroides thetaiotaomicron* VPI-5482 proteome (Uniprot: UP000001414) allowing for oxidation on Methionine. Prior to MaxQuant analysis dataset acquired on the Fusion Lumos were separated into individual FAIMS fractions using the FAIMS MzXML Generator<sup>9</sup>. The LFQ and “Match Between Run” options were enabled to allow comparison between samples. The resulting data files were processed using Perseus (v1.4.0.6)<sup>10</sup> to filter proteins not observed in at least four biological replicates of a single group. ANOVA and Pearson correlation analyses were performed to compare groups. Predicted localization and topology analysis for proteins identified by MS were performed using UniProt<sup>11</sup>, PSORT<sup>12</sup>, SignalP<sup>13</sup> and PULDB<sup>14</sup>.

#### **LC-MS analysis of lipids from TM and OMVs.**

WT,  $\Delta dma1$ , and its complemented strain were grown overnight anaerobically in 5mL of BHI media prior to being diluted into 140 mL and grown for 20 h. TMs and OMVs were collected from each strain. Four individual biological replicates of each fraction were performed for each strain. Total lipids were extracted according to Bligh and Dyer chloroform:methanol method <sup>2</sup>. Briefly, 2 volumes of methanol, 1 volume of chloroform, and 0.8 volumes of Milli-Q water were added to 1 volume of PBS-resuspended sample in solvent-resistant glass tubes. Contents were mixed for 2 min by vortexing, and 1 volume of chloroform was added to the mixture. Samples were vortexed for another minute, then centrifugated for 5 min at 4,000 rpm. After centrifugation, the bottom phase (organic) was recovered using a glass Pasteur pipette and stored in solvent-sealed vials at  $-80^{\circ}\text{C}$  until lipid analysis by LC-MS.

Untargeted LC/MS analyses were conducted on an Agilent 6550 A QTOF instrument with an Agilent 1290 high-performance liquid chromatograph (HPLC) with an autosampler, operated using Agilent MassHunter software (Santa Clara, CA, USA). Separation of the total lipid extracts was achieved using a Thermo Fisher (Waltham, MA, USA) BETASIL C<sub>18</sub> column (100  $\times$  2.1 mm, 5  $\mu\text{m}$ ) at a flow rate of 300  $\mu\text{L}/\text{min}$  at room temperature. The mobile phase contained 5 mM ammonium formate (pH 5.0) both in solvent A, acetonitrile:water (60:40, vol/vol), and solvent B, isopropanol:acetonitrile (90:10, vol/vol). A gradient elution was applied in the following manner: 68% A, 0 to 1.5 min; 68 to 55% A, 1.5 to 4 min; 55 to 48% A, 4 to 5 min; 48 to 42% A, 5 to 8 min; 42 to 34% A, 8 to 11 min; 34 to 30% A, 11 to 14 min; 30 to 25% A, 14 to 18 min; 25 to 3% A, 18 to 23 min; 3 to 0% A, 25 to 30 min; 0% A, 30 to 35 min; 68% A, 35 to 40 min. Both the positive-ion and negative-ion electrospray ionization (ESI) MS scans were acquired in the mass range of 200 to 2,000 Da at a rate of 2 scans/min. High-resolution ( $R=100,000$  at  $m/z$  400) mass spectrometric analyses of the lipid extracts were also conducted on a Thermo LTQ Orbitrap Velos. Lipids were loop injected into the ESI ion source using a built-in syringe pump which was set to continuously deliver a flow of 20  $\mu\text{L}/\text{min}$  methanol with 0.5%  $\text{NH}_4\text{OH}$ . The scanned mass spectra were recalibrated internally with a known mass, namely, 13:0/15:0 PE at  $m/z$  634.4453. Linear ion trap (LIT) multistage MS ( $\text{MS}^n$ ) spectra were obtained for structural identification as described previously <sup>3-5</sup>.

**Negative staining and analysis by transmission electron microscopy.** For quantitative analyses at the ultrastructural level, 200 mesh formvar/carbon-coated copper grids (Ted Pella Inc., Redding CA) were coated with 50 $\mu\text{g}/\text{ml}$  poly-L-lysine (Sigma, St Louis, MO) for 10 min at  $37^{\circ}\text{C}$ . Excess fluid was removed, and grids were allowed to air dry. Poly-L-lysine coating allowed for even distribution of material across the grid. Bacterial OMVs were fixed with 1% glutaraldehyde (Ted Pella Inc.) and allowed to absorb onto freshly glow discharged poly-L-lysine-coated grids for 10 min. Grids were then washed in  $\text{dH}_2\text{O}$  and stained with 1% aqueous uranyl acetate

(Ted Pella Inc.) for 1 min. Excess liquid was gently wicked off and grids were allowed to air dry. Samples were viewed on a JEOL 1200EX transmission electron microscope (JEOL USA, Peabody, MA) equipped with an AMT 8-megapixel digital camera (Advanced Microscopy Techniques, Woburn, MA). Each OMV sample was processed in triplicate (3 grids). Ten random images were taken at a magnification of 25,000x from various areas of the grid with a total of 90 images for each sample, and the number of OMV in each image was quantified.

## **References**

1. Zhu, Z. *et al.* Entropy of a bacterial stress response is a generalizable predictor for fitness and antibiotic sensitivity. *Nat. Commun.* 1–15 (2020) doi:10.1038/s41467-020-18134-z.
2. Bligh, E. G. & Dyer, W. J. A RAPID METHOD OF TOTAL LIPID EXTRACTION AND PURIFICATION. *Can. J. Biochem. Physiol.* **37**, 911–917 (1959).
3. Hsu, F.-F. Complete structural characterization of ceramides as [M-H]<sup>-</sup> ions by multiple-stage linear ion trap mass spectrometry. *Lipidomics Funct. Lipid Biol.* **130**, 63–75 (2016).
4. Hsu, F.-F., Turk, J., Zhang, K. & Beverley, S. M. Characterization of inositol phosphorylceramides from *Leishmania major* by tandem mass spectrometry with electrospray ionization. *J. Am. Soc. Mass Spectrom.* **18**, 1591–1604 (2007).
5. Hsu, F.-F. & Turk, J. Electrospray ionization with low-energy collisionally activated dissociation tandem mass spectrometry of glycerophospholipids: Mechanisms of fragmentation and structural characterization. *LIPIDOMICS Dev. Appl.* **877**, 2673–2695 (2009).

## Supplementary Text

**Table S1: Strain, Plasmids, and Oligonucleotides**

| <b>Strains used in this study</b>  |                                          |                                                                                      |                              |
|------------------------------------|------------------------------------------|--------------------------------------------------------------------------------------|------------------------------|
| <b>Name</b>                        | <b>Strain</b>                            | <b>Features</b>                                                                      | <b>Reference/Source</b>      |
| <i>Escherichia coli</i>            | s17-1 $\lambda$ pir                      | Conjugation donor strain to introduce plasmids into <i>B. thetaiotaomicron</i>       | Jeffrey I. Gordon Laboratory |
| <i>Escherichia coli</i>            | BL21                                     | Expression and isolation of heterologous proteins                                    | Tracey Raivio Laboratory     |
| <i>Escherichia coli</i>            | BL21 pGSTag                              | Expresses GST under IPTG inducible promoter                                          | This study                   |
| <i>Escherichia coli</i>            | BL21 pGSTag_Dma1(1:40)                   | Expresses the N-terminal 40 aa of Dma1 fused to the C-terminus of GST                | This study                   |
| <i>Escherichia coli</i>            | BL21 pET32a-TRXtag                       | Expresses TRX under IPTG inducible promoter                                          | This study                   |
| <i>Escherichia coli</i>            | BL21 pET32a-TRXtag_Das1                  | Expresses Das1 fused to the C-terminus of TRX                                        | This study                   |
| <i>B. thetaiotaomicron</i>         | VPI-5482                                 | Wild-type strain. Erm <sup>S</sup>                                                   | Jeffrey I. Gordon Laboratory |
| <i>B. thetaiotaomicron</i>         | VPI-5482 pwwBoINL-Nluc                   | Expressing <i>B. ovatus</i> inulinase fused to Nluc                                  | This study                   |
| <i>B. thetaiotaomicron</i>         | VPI-5482 $\Delta$ das1                   | das1 ( <i>bt_4720</i> ) deletion mutant                                              | This study                   |
| <i>B. thetaiotaomicron</i>         | VPI-5482 $\Delta$ dma1                   | dma1 ( <i>bt_4721</i> ) deletion mutant                                              | This study                   |
| <i>B. thetaiotaomicron</i>         | VPI-5482 $\Delta$ das1-dma1              | das1 ( <i>bt_4720</i> )-dma1 ( <i>bt_4721</i> ) double deletion mutant               | This study                   |
| <i>B. thetaiotaomicron</i>         | VPI-5482 $\Delta$ das2                   | das2 ( <i>bt_1559</i> ) deletion mutant                                              | This study                   |
| <i>B. thetaiotaomicron</i>         | VPI-5482 $\Delta$ dma2                   | dma2 ( <i>bt_1558</i> ) deletion mutant                                              | This study                   |
| <i>B. thetaiotaomicron</i>         | VPI-5482 $\Delta$ das2-dma2              | das2 ( <i>bt_1559</i> )-dma2 ( <i>bt_1558</i> ) double deletion mutant               | This study                   |
| <i>B. thetaiotaomicron</i>         | VPI-5482 $\Delta$ das1                   | das1 ( <i>bt_4720</i> ) deletion mutant, complemented                                | This study                   |
| <i>B. thetaiotaomicron</i>         | VPI-5482 $\Delta$ dma1 pwwDma1-His       | dma1 ( <i>bt_4721</i> ) deletion mutant, complemented                                | This study                   |
| <i>B. thetaiotaomicron</i>         | VPI-5482 $\Delta$ das1-dma1 pwwDas1-Dma1 | das1 ( <i>bt_4720</i> )-dma1 ( <i>bt_4721</i> ) double deletion mutant, complemented | This study                   |
| <i>B. thetaiotaomicron</i>         | VPI-5482 $\Delta$ dma1 pwwFLAG-Dma1-His  | dma1 ( <i>bt_4721</i> ) deletion mutant expressing pwwFLAG-Dma1-His                  | This study                   |
| <b>Plasmids used in this study</b> |                                          |                                                                                      |                              |
| <b>Name</b>                        | <b>Resistance</b>                        | <b>Features</b>                                                                      | <b>Reference/Source</b>      |
| pSAM-Bt                            | Amp <sup>R</sup> ,Erm <sup>R</sup>       | Vector base to perform transposon mutagenesis                                        | Goodman et al., 2009         |

|                  |                                                      |                                                                                              |                               |
|------------------|------------------------------------------------------|----------------------------------------------------------------------------------------------|-------------------------------|
| pSAM-Bt_Tet      | Amp <sup>R</sup> ,Tet <sup>R</sup>                   | pSAM-Bt backbone containing tetracycline resistance cassette                                 | This work                     |
| pSIE1            | Amp <sup>R</sup> ,Erm <sup>R</sup> ,aTc <sup>S</sup> | P1T_DP-GH023_ss- <i>bte1</i> ;<br>P1T_DP-GH023_ss- <i>bfe1</i> ;<br>P <sub>BFP1E6</sub> tetR | Bencivenga-Barry et al., 2020 |
| pSIE1_das1       | Amp <sup>R</sup> ,Erm <sup>R</sup> ,aTc <sup>S</sup> | pSIE1 deletion construct for <i>B. thetaiotaomicron</i> VPI-5482 <i>das1</i>                 | This study                    |
| pSIE1_dma1       | Amp <sup>R</sup> ,Erm <sup>R</sup> ,aTc <sup>S</sup> | pSIE1 deletion construct for <i>B. thetaiotaomicron</i> VPI-5482 <i>dma1</i>                 | This study                    |
| pSIE1_das1-dma1  | Amp <sup>R</sup> ,Erm <sup>R</sup> ,aTc <sup>S</sup> | pSIE1 deletion construct for <i>B. thetaiotaomicron</i> VPI-5482 <i>das1</i> & <i>dma1</i>   | This study                    |
| pSIE1_das2       | Amp <sup>R</sup> ,Erm <sup>R</sup> ,aTc <sup>S</sup> | pSIE1 deletion construct for <i>B. thetaiotaomicron</i> VPI-5482 <i>das2</i>                 | This study                    |
| pSIE1_dma2       | Amp <sup>R</sup> ,Erm <sup>R</sup> ,aTc <sup>S</sup> | pSIE1 deletion construct for <i>B. thetaiotaomicron</i> VPI-5482 <i>dma2</i>                 | This study                    |
| pSIE1_das2-dma2  | Amp <sup>R</sup> ,Erm <sup>R</sup> ,aTc <sup>S</sup> | pSIE1 deletion construct for <i>B. thetaiotaomicron</i> VPI-5482 <i>das2</i> & <i>dma2</i>   | This study                    |
| pSIE1_BT1287     | Amp <sup>R</sup> ,Erm <sup>R</sup> ,aTc <sup>S</sup> | pSIE1 deletion construct for <i>B. thetaiotaomicron</i> VPI-5482 BT_1287                     | This study                    |
| pSIE1_nigD1      | Amp <sup>R</sup> ,Erm <sup>R</sup> ,aTc <sup>S</sup> | pSIE1 deletion construct for <i>B. thetaiotaomicron</i> VPI-5482 <i>NigD1</i> (BT_4005)      | This study                    |
| pSIE1_nigD2      | Amp <sup>R</sup> ,Erm <sup>R</sup> ,aTc <sup>S</sup> | pSIE1 deletion construct for <i>B. thetaiotaomicron</i> VPI-5482 <i>NigD2</i> (BT_4719)      | This study                    |
| pWW3452          | Amp <sup>R</sup> ,Erm <sup>R</sup>                   | AmpR-ermG-RP4/R6K-[P_BfP1E6-RBSlp-LPGFP-tag-Term]-NBU2, AmpR ErmR                            | Whitaker et al., 2017         |
| pWW3867          | Amp <sup>R</sup> ,Erm <sup>R</sup>                   | AmpR-ermG-RP4/R6K-[P_BT1311-RBSphageGFP-tag-Term]-NBU2, AmpR ErmR                            | Whitaker et al., 2017         |
| pwwBoINL-NLuc    | Amp <sup>R</sup> ,Erm <sup>R</sup>                   | pWW3867 containing Inulinase-NLuc fusion                                                     | This study                    |
| pwwNLuc          | Amp <sup>R</sup> ,Erm <sup>R</sup>                   | pWW3867 containing NLuc                                                                      | This study                    |
| pwwEV            | Amp <sup>R</sup> ,Erm <sup>R</sup>                   | pWW3867 backbone                                                                             | Whitaker et al., 2017         |
| pwwDas1-His      | Amp <sup>R</sup> ,Erm <sup>R</sup>                   | pWW3867 containing Das1 with C-terminal 6xHis tag                                            | This study                    |
| pwwDma1-His      | Amp <sup>R</sup> ,Erm <sup>R</sup>                   | pWW3867 containing Dma1 with C-terminal 10xHis tag                                           | This study                    |
| pwwFLAG-Dma1-His | Amp <sup>R</sup> ,Erm <sup>R</sup>                   | pWW3867 containing Dma1 with an N-terminal 3xFlag tag and a C-terminal 10xHis tag            | This study                    |
| pwwDas1-Dma1-His | Amp <sup>R</sup> ,Erm <sup>R</sup>                   | pWW3867 containing Das1 and Dma1 with C-terminal His tags                                    | This study                    |

|               |                  |                                                         |                     |
|---------------|------------------|---------------------------------------------------------|---------------------|
| pGSTag        | Amp <sup>R</sup> | Expresses GST and is used to create GST fusion proteins | Ron et al. 1992     |
| pET32a-TRXtag | Amp <sup>R</sup> | Expresses TRX and is used to create TRX fusion proteins | Bennett et al. 2002 |

### Oligonucleotides used in this study

| Name                   | Sequence                                                            | Template                                        | Description              |
|------------------------|---------------------------------------------------------------------|-------------------------------------------------|--------------------------|
| F_Nluc                 | GTCTTCACACTCGAAGATTC                                                | pLenti6.2-Nanoluc-ccdB vector                   | For cloning into pWW3867 |
| R_RpoD_Nluc(6His)      | TCGAGCTAATCAGCTAGGATTTAG<br>TGATGATGATGATGATGACCCGCC<br>AGAATGCGTTC | pLenti6.2-Nanoluc-ccdB vector                   | For cloning into pWW3867 |
| F_BoIN-RpoD            | TCCAAATCTGTTTTTAAAGAATGAA<br>GATAAATAAATTCTTAATAAGCGG               | <i>B. ovatus</i> ATCC 8483 genomic DNA          | For cloning into pWW3867 |
| R_BoIN(5F)Nluc         | AAATCTTCGAGTGTGAAGACAGAT<br>CCTCCTCCTCCTTTCTTAGCGCTT<br>AGATAATG    | <i>B. ovatus</i> ATCC 8483 genomic DNA          | For cloning into pWW3867 |
| F_pww-NLuc-His linear  | GTCTTCACACTCGAAGATTC                                                | pLenti6.2-Nanoluc-ccdB vector                   | For cloning into pWW3867 |
| R_pww-NLuc             | TCGAGCTAATCAGCTAGGATTTAG<br>TGATGATGATGATGATGACCCGCC<br>AGAATGCG    | pLenti6.2-Nanoluc-ccdB vector                   | For cloning into pWW3867 |
| F_BT4720-Downstream    | GCGGCCGCTCTAGAACTAGTCGC<br>CTTCGTCGTTATG                            | <i>B. thetaiotaomicron</i> VPI-5482 genomic DNA | For cloning into pSIE1   |
| R_BT4720-Downstream    | TTTCTCTTCCATATCTCTACTTGCT<br>TATACACGTGTTTACC                       | <i>B. thetaiotaomicron</i> VPI-5482 genomic DNA | For cloning into pSIE1   |
| F_BT4720-Upstream      | GTAACACGTGTATAAGCAAGTAG<br>AGATATGGAAGAGAAAGAATTATG                 | <i>B. thetaiotaomicron</i> VPI-5482 genomic DNA | For cloning into pSIE1   |
| R_BT4720-Upstream      | GATTAGCATTATGAGGATCCATTG<br>CTGATCATTGGGTATG                        | <i>B. thetaiotaomicron</i> VPI-5482 genomic DNA | For cloning into pSIE1   |
| F_BT4721_Up            | GCGGCCGCTCTAGAACTAGTTGG<br>TCAGGATCTCTTTTATTTCTTTAC<br>CT           | <i>B. thetaiotaomicron</i> VPI-5482 genomic DNA | For cloning into pSIE1   |
| R_BT4721_Up            | ATCTCTACCTATCCGTTATTCATTA<br>TCCATTC                                | <i>B. thetaiotaomicron</i> VPI-5482 genomic DNA | For cloning into pSIE1   |
| F_BT4721_Down          | AATAACGGATAGGTAGAGATTAGA<br>ACCCGGTGTTGCTTATTTCTTTGA<br>TGATG       | <i>B. thetaiotaomicron</i> VPI-5482 genomic DNA | For cloning into pSIE1   |
| R_BT4721_Down          | AAGATTAGCATTATGAGGATCCGG<br>TGACGTATGTTTCAGTGTTCC                   | <i>B. thetaiotaomicron</i> VPI-5482 genomic DNA | For cloning into pSIE1   |
| R_BT4720/21-Downstream | ATATAGCTCAACTATATTGATTGCT<br>TATACACGTGTTTACC                       | <i>B. thetaiotaomicron</i> VPI-5482 genomic DNA | For cloning into pSIE1   |
| F_BT4721/20-Upstream   | GTAACACGTGTATAAGCAATCAA<br>TATAGTTGAGCTATATATTTAAAA<br>GC           | <i>B. thetaiotaomicron</i> VPI-5482 genomic DNA | For cloning into pSIE1   |
| F_BT1558 Downstream    | GCGGCCGCTCTAGAACTAGTCAG<br>GCACAGTGTCATAG                           | <i>B. thetaiotaomicron</i> VPI-5482 genomic DNA | For cloning into pSIE1   |
| R_BT1558 Downstream    | CGCTGATGCCGGGATGACTGTCC<br>TTATAAAAATGAAAAAACACTTAT<br>G            | <i>B. thetaiotaomicron</i> VPI-5482 genomic DNA | For cloning into pSIE1   |

|                         |                                                                                       |                                                 |                          |
|-------------------------|---------------------------------------------------------------------------------------|-------------------------------------------------|--------------------------|
| F_BT1558 Upstream       | TTTTTTCATTTTTATAAGGACAGTC<br>ATCCCGGC                                                 | <i>B. thetaiotaomicron</i> VPI-5482 genomic DNA | For cloning into pSIE1   |
| R_BT1558 Upstream       | GATTAGCATTATGAGGATCCCGTG<br>CTGCAGCTG                                                 | <i>B. thetaiotaomicron</i> VPI-5482 genomic DNA | For cloning into pSIE1   |
| F_BT1559 Downstream     | GCGGCCGCTCTAGAAGTAGTGCT<br>TTCAGCGGGATG                                               | <i>B. thetaiotaomicron</i> VPI-5482 genomic DNA | For cloning into pSIE1   |
| R_BT1559 Downstream     | ACACCCTCTATGCCAAACAATGAA<br>ATAACCGATCTGTTTTCG                                        | <i>B. thetaiotaomicron</i> VPI-5482 genomic DNA | For cloning into pSIE1   |
| F_BT1559 Upstream       | GAAACAGATCGGTTATTTTCATTGT<br>TTGGCATAGAGGG                                            | <i>B. thetaiotaomicron</i> VPI-5482 genomic DNA | For cloning into pSIE1   |
| R_BT1559 Upstream       | GATTAGCATTATGAGGATCCTTGG<br>ATACCCGCAAG                                               | <i>B. thetaiotaomicron</i> VPI-5482 genomic DNA | For cloning into pSIE1   |
| F_BT1287_Dwn            | GCGGCCGCTCTAGAAGTAGTCCG<br>GTCATCCTTTACG                                              | <i>B. thetaiotaomicron</i> VPI-5482 genomic DNA | For cloning into pSIE1   |
| R_BT1287_Dwn            | TAAATAATTAACAGTCACCTTTAG<br>TTAAAGTTTTACTACTTGTTAAAC                                  | <i>B. thetaiotaomicron</i> VPI-5482 genomic DNA | For cloning into pSIE1   |
| F_BT1287_Up             | GTATGAAAACTTTAACTAAAGGTG<br>ACTGTTTAATTATTTACAG                                       | <i>B. thetaiotaomicron</i> VPI-5482 genomic DNA | For cloning into pSIE1   |
| R_BT1287_Up             | GATTAGCATTATGAGGATCCAGAG<br>GCGAATGCG                                                 | <i>B. thetaiotaomicron</i> VPI-5482 genomic DNA | For cloning into pSIE1   |
| F_BT4005_Dwn            | GCGGCCGCTCTAGAAGTAGTTAG<br>GAAATCCTACGGTAG                                            | <i>B. thetaiotaomicron</i> VPI-5482 genomic DNA | For cloning into pSIE1   |
| R_BT4005_Dwn            | AGTTATTTATAAAAGTTTTGATTTG<br>TTCCTCTCTTTTTAATTC                                       | <i>B. thetaiotaomicron</i> VPI-5482 genomic DNA | For cloning into pSIE1   |
| F_BT4005_Up             | TTAAAAAGAGAGGAACAAATCAAA<br>ACTTTTATAAATAACTAAACCTAAA<br>C                            | <i>B. thetaiotaomicron</i> VPI-5482 genomic DNA | For cloning into pSIE1   |
| R_BT4005_Up             | GATTAGCATTATGAGGATCCACCT<br>GTTCTCGC                                                  | <i>B. thetaiotaomicron</i> VPI-5482 genomic DNA | For cloning into pSIE1   |
| F_BT4719_Dwn            | GCGGCCGCTCTAGAAGTAGTAA<br>GTGCTGTTTTTGCC                                              | <i>B. thetaiotaomicron</i> VPI-5482 genomic DNA | For cloning into pSIE1   |
| R_BT4719_Dwn            | AAAAAACATTTTTATAGTATATCTAG<br>TAATTATAGAAACACTC                                       | <i>B. thetaiotaomicron</i> VPI-5482 genomic DNA | For cloning into pSIE1   |
| F_BT4719_Up             | TGTTTCTATAATTACTAGATACTA<br>TAAAAATGTTTTTAATGAGTACTA<br>TTTAC                         | <i>B. thetaiotaomicron</i> VPI-5482 genomic DNA | For cloning into pSIE1   |
| R_BT4719_Up             | GATTAGCATTATGAGGATCCTCTTT<br>CTCTCCATATCTCTAC                                         | <i>B. thetaiotaomicron</i> VPI-5482 genomic DNA | For cloning into pSIE1   |
| F_RpoD_BT4720-His       | TCCAAATCTGTTTTTAAAGAATGG<br>AAGAATTTGAGTTGTCG                                         | <i>B. thetaiotaomicron</i> VPI-5482 genomic DNA | For cloning into pWW3867 |
| R_RpoD_BT4720-His       | TCGAGCTAATCAGCTAGGATCTAG<br>TGATGATGATGATGATGACCTCCG<br>TTATTCATTATCCATTCTTTTAC       | <i>B. thetaiotaomicron</i> VPI-5482 genomic DNA | For cloning into pWW3867 |
| F_pwwRpoD_BT4721-His    | CCAAATCTGTTTTTAAAGAATGGA<br>AGAGAAAGAATTATGG                                          | <i>B. thetaiotaomicron</i> VPI-5482 genomic DNA | For cloning into pWW3867 |
| R_pwwRpoD_BT4721-His    | TCGAGCTAATCAGCTAGGATCTAA<br>TGATGATGATGGTATGATGATGA<br>TGATGACCATAAGTAAGTCGGATA<br>CC | <i>B. thetaiotaomicron</i> VPI-5482 genomic DNA | For cloning into pWW3867 |
| R_RpoD_BT4720/21-His    | TTTCTCTTCCATATCTCTACCTAGT<br>GATGATGATGATGATGACCTCCGT<br>TATTCATTATCCATTCTTTTAC       | <i>B. thetaiotaomicron</i> VPI-5482 genomic DNA | For cloning into pWW3867 |
| F_pwwRpoD_BT4721/20-His | CATCATCACTAGGTAGAGATATGG<br>AAGAGAAAGAATTATGG                                         | <i>B. thetaiotaomicron</i> VPI-5482 genomic DNA | For cloning into pWW3867 |
| F_FLAG-4721_lin         | ATGGATTACAAGGACGATG                                                                   | pWW3452 DNA                                     | For cloning into pWW3452 |

|                         |                                                                                         |                                                 |                                |
|-------------------------|-----------------------------------------------------------------------------------------|-------------------------------------------------|--------------------------------|
| R_N-term_3x-FLAG_BT4721 | ATCCATAATTCTTTCTCTTCTCCAG<br>ATTTATCATCATCG                                             | pWW3452 DNA                                     | For cloning into pWW3452       |
| F_Phg_FLAG-BT4721-His   | ACGATGATGATAAATCTGGAGAAG<br>AGAAAGAATTATGGATG                                           | <i>B. thetaiotaomicron</i> VPI-5482 genomic DNA | For cloning into pWW3452       |
| R_pwwRpoD_BT4721-His    | TCGAGCTAATCAGCTAGGATCTAA<br>TGATGATGATGGTGTATGATGATGA<br>TGATGACCATAAGTAAGTCGGATA<br>CC | <i>B. thetaiotaomicron</i> VPI-5482 genomic DNA | For cloning into pWW3452       |
| F_pGSTag_lin            | GCAGAACGTCGCGAA                                                                         | pGSTag DNA                                      | For cloning into pGSTag        |
| R_pGSTag_lin            | AGATCCACGCGGAAC                                                                         | pGSTag DNA                                      | For cloning into pGSTag        |
| F_GST-BT4721_1-80aa     | ATCTGGTTCCGCGTGGATCTATGG<br>AAGAGAAAGAATTATGG                                           | <i>B. thetaiotaomicron</i> VPI-5482 genomic DNA | For cloning into pGSTag        |
| R_GST-BT4721_1-40aa     | AGAATTTCCGCGACGTTCTGCCTAC<br>CTCTCCACAGG                                                | <i>B. thetaiotaomicron</i> VPI-5482 genomic DNA | For cloning into pGSTag        |
| F_pET32a-TRX_lin        | CATCATCATCATCATCATTGAG                                                                  | pET32a-TRXtag                                   | For cloning into pET32a-TRXtag |
| R_pET32a-TRX_lin        | CTTGTCGTCGTCGTC                                                                         | pET32a-TRXtag                                   | For cloning into pET32a-TRXtag |
| F_TRX-BT4720_His        | GTACCGACGACGACGACAAGATG<br>GAAGAATTTGAGTTGTC                                            | <i>B. thetaiotaomicron</i> VPI-5482 genomic DNA | For cloning into pET32a-TRXtag |
| R_TRX-BT4720-His        | CAATGATGATGATGATGATGTCCG<br>TTATTCATTATCCATTC                                           | <i>B. thetaiotaomicron</i> VPI-5482 genomic DNA | For cloning into pET32a-TRXtag |



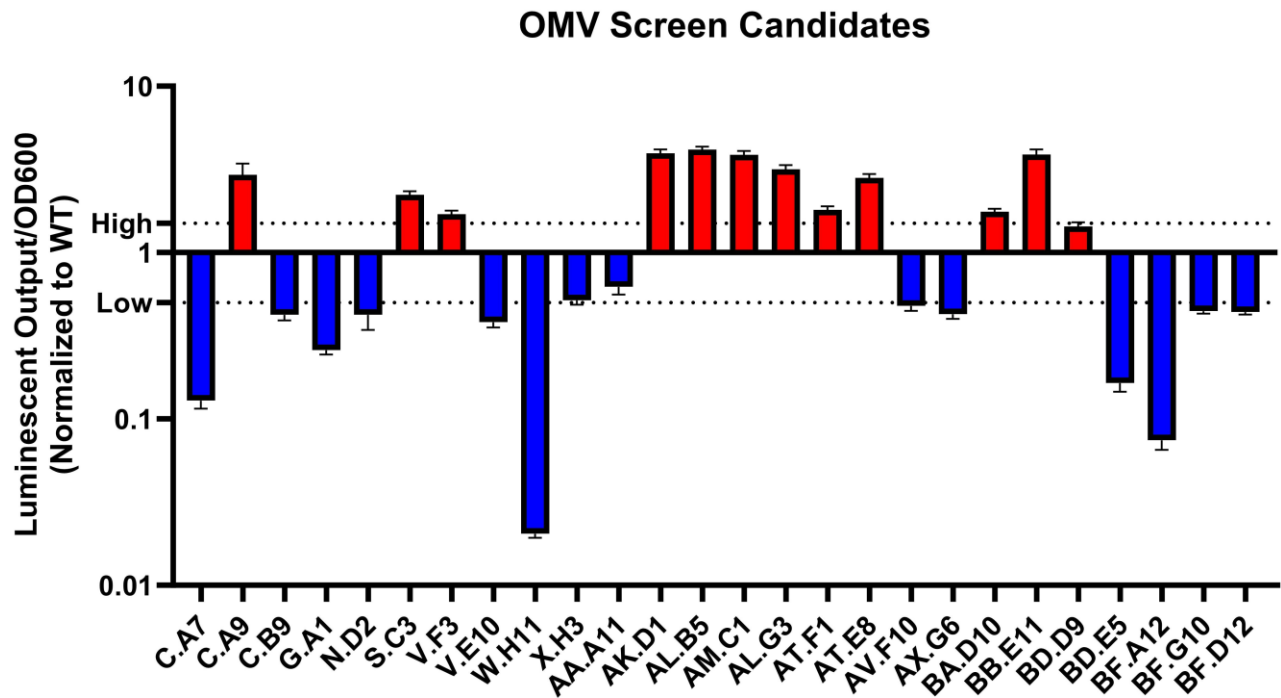

**Figure S1: Hyper- and hypovesiculating strains were identified during OMV screening.** Nano-Glo assays were performed using filtered supernatants isolated from each potential candidate. Total luminescent output of each candidate was standardized by OD<sub>600</sub>, then normalized to the wild-type. Candidates exhibiting a 1.5-fold increase in luminescence were considered hypovesiculating, while those displaying a 0.5-fold decrease were deemed hypovesiculating.

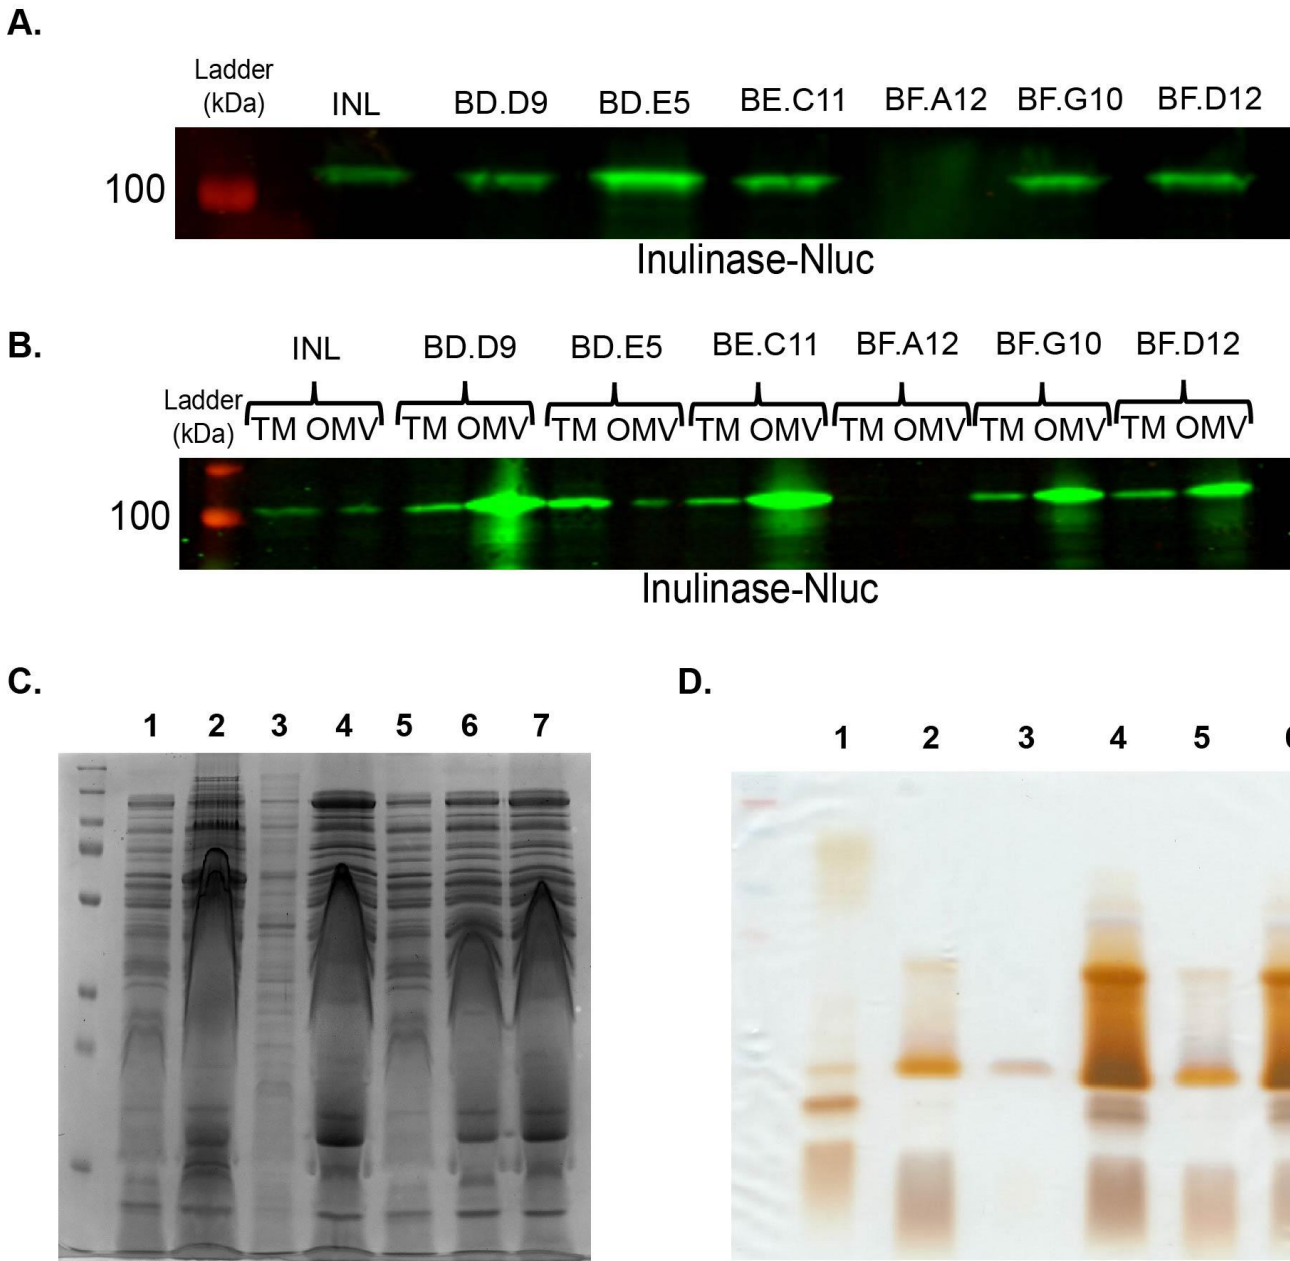

**Figure S2: Example of validation for OMV screen candidates.** Western blots were performed using (A) whole cells (WCs) to check the expression of the OMV reporter, and (B) TMs and OMVs were isolated to check partitioning of the OMV reporter. (C) Protein profiles of OMVs from each transposon mutant were analyzed by SDS-PAGE followed by Coomassie staining. 1: WT, 2: BD.D9, 3: BD.E5, 4: BE.C11, 5: BF.A12, 6: BF.G10, 7: BF.D12. (D) Relative abundance of LPS content of transposon mutants were analyzed by SDS-PAGE followed by LPS silver staining. 1: *E. coli* 0111:B4, 2: WT, 3: BD.E5, 4: BE.C11, 5: BF.A12, 6: BF.G10, 7: BF.D12

| <b>Candidate</b> | <b>Insertion Site(s)</b> | <b>Gene(s) Interrupted</b> | <b>Gene Annotations</b>                                     |
|------------------|--------------------------|----------------------------|-------------------------------------------------------------|
| C.A7             | 935,471                  | BT_0753                    | Anti-sigma factor                                           |
| C.A9             | 458,218; 1,402,418       | BT_0372; BT_1115           | Aldose 1-epimerase; Aldo/keto reductase                     |
| C.B9             | 4,377,534                | BT_3397                    | Pyruvate ferredoxin oxidoreductase                          |
| G.A1             | 6,138,309                | N/A                        | Insertion in INL-Nluc expression vector                     |
| N.D2             | 2,722,830                | N/A                        | Insertion in intergene region between BT_2164-65            |
| S.C3             | 3,456,177                | BT_2786                    | 30S ribosomal protein s15                                   |
| V.E10            | 4,545,446;<br>5,611,550  | BT_3519; BT_4261           | SusC-like protein; DUF4847 domain-containing protein        |
| V.F3             | 2,803,639                | BT_2235                    | Hypothetical protein                                        |
| W.H11            | 6,138,327                | N/A                        | Insertion in INL-Nluc expression vector                     |
| X.H3             | 5,611,256                | BT_4261                    | DUF4847 domain-containing protein                           |
| AA.A11           | 4,410,790;<br>4,545,446  | BT_3422; BT_3519           | alpha-2-macroglobulin; SusC-like protein                    |
| AK.D1            | 3,115,604                | BT_2493                    | ROK family protein                                          |
| AL.B5            | 3,115,511                | BT_2493                    | ROK family protein                                          |
| AL.G3            | N/A                      | N/A                        |                                                             |
| AM.C1            | 3,116,101                | BT_2493                    | ROK family protein                                          |
| AT.E8            | N/A                      | N/A                        |                                                             |
| AT.F1            | 4,820,482                | BT_3709                    | Elongation Factor P                                         |
| AT.F10           | 4,820,482                | BT_3709                    | Elongation Factor P                                         |
| AX.G6            | 6,196,151                | BT_4721                    | Outer membrane beta-barrel domain-containing protein        |
| BA.D10           | 4,820,482                | BT_3709                    | Elongation Factor P                                         |
| BB.E11           | 3,115,663                | BT_2493                    | ROK family protein                                          |
| BD.D9            | 374,098; 4,155,947       | BT_0311; BT_3255           | 2-oxo acid dehydrogenase; N6-adenine-specific DNA methylase |
| BD.E5            | 4,304,745                | BT_3341                    | SbsA Ig-like domain-containing protein                      |
| BE.C11           | 6,196,148                | BT_4721                    | Outer membrane beta-barrel domain-containing protein        |
| BF.A12           | 6,138,331                | N/A                        | Insertion in INL-Nluc expression vector                     |
| BF.D12           | 6,196,613                | BT_4721                    | Outer membrane beta-barrel domain-containing protein        |
| BF.G10           | 6,196,617                | BT_4721                    | Outer membrane beta-barrel domain-containing protein        |

**Table S2: List of candidate genes identified during OMV Screen.**

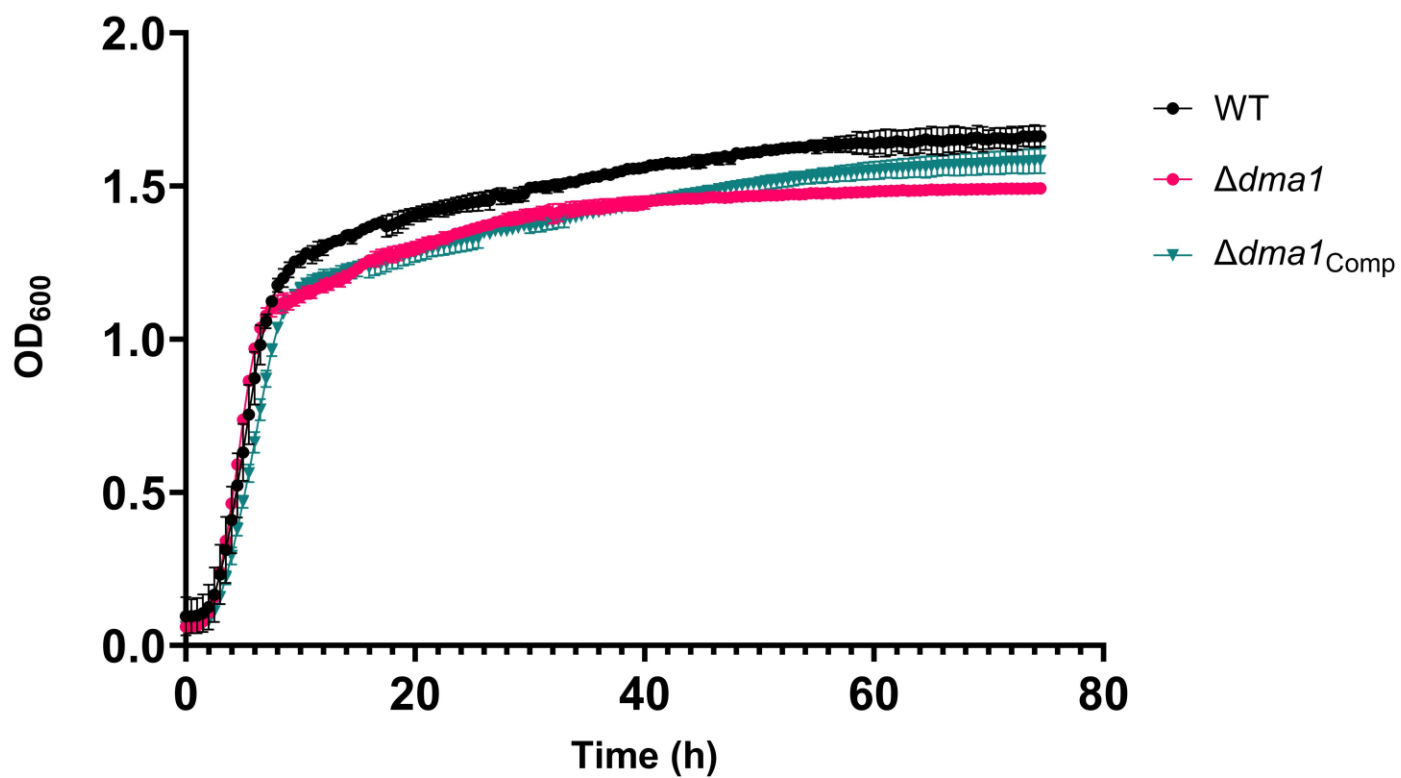

**Figure S3: Mutation of *dma1* does not significantly impact growth *in vitro*.** Growth curves performed in BHI media for WT,  $\Delta dma1$ , and its corresponding complemented strain.

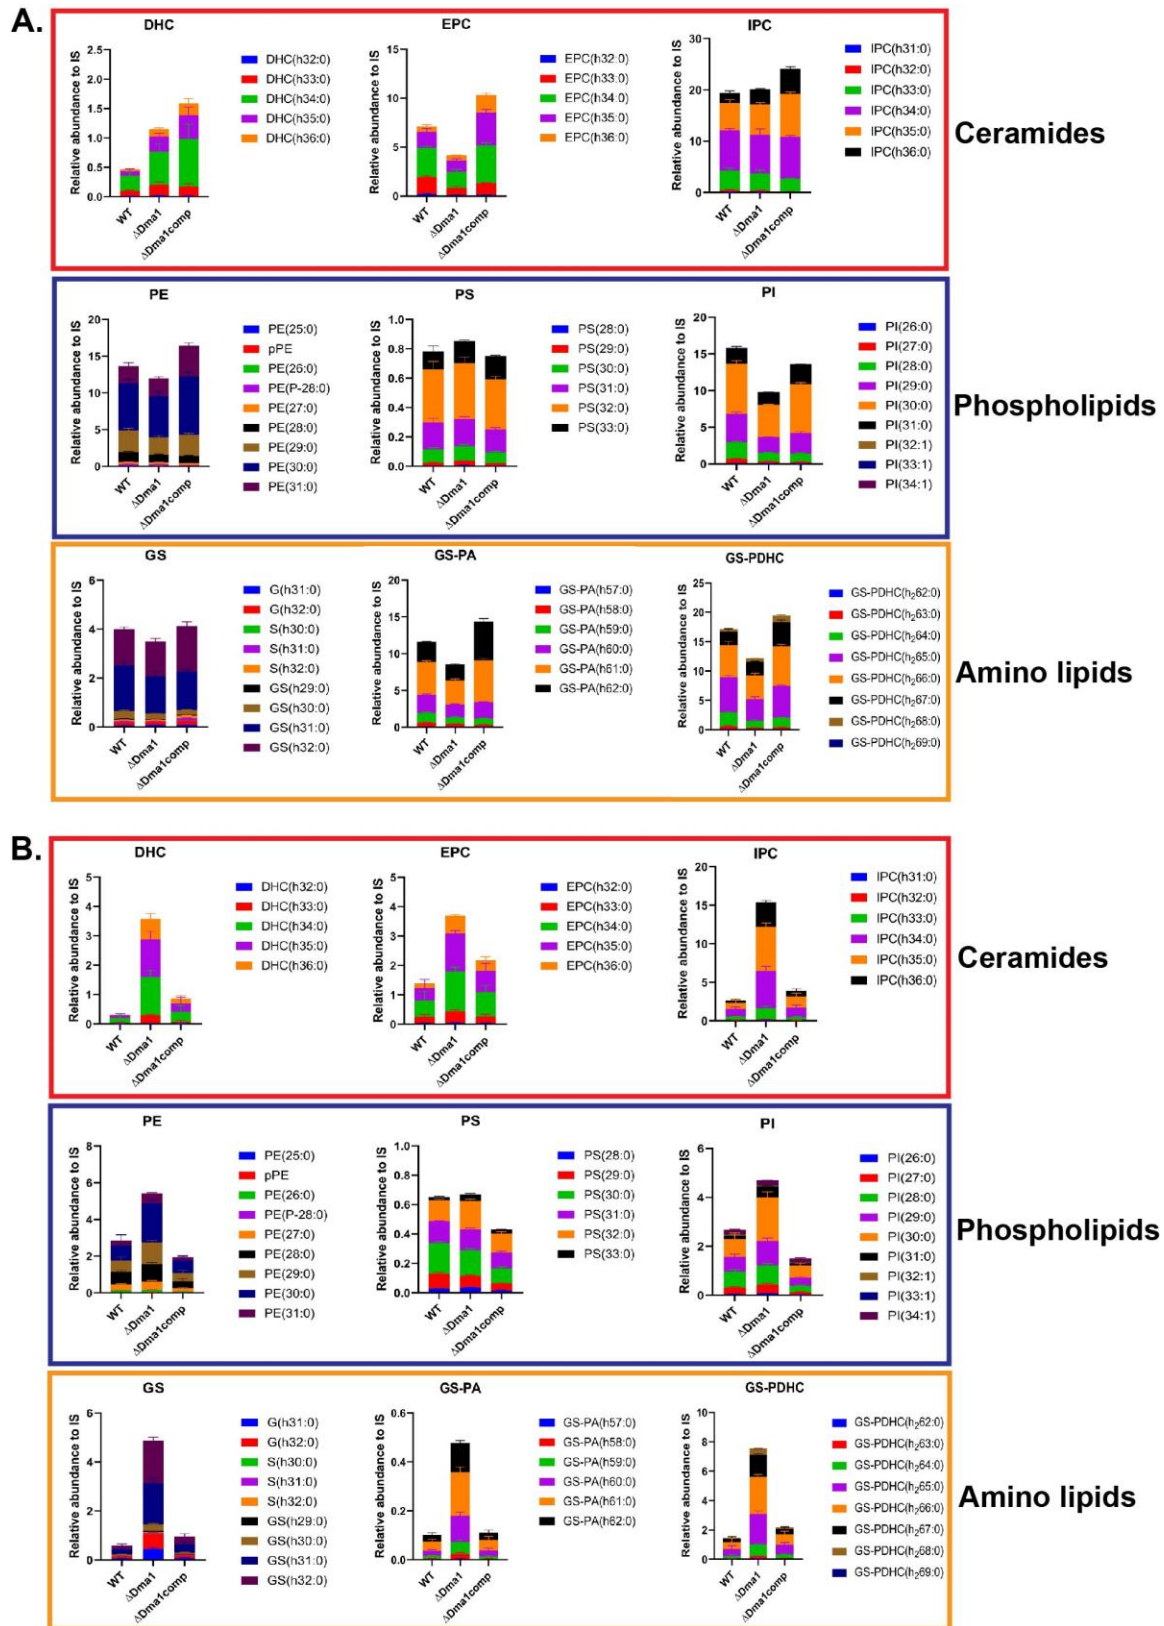

**Figure S4: Hypervesiculation causes  $\Delta dma1$  to secrete significantly more membrane lipids.** Total lipids were isolated from (A) TM and (B) OMV fractions from WT,  $\Delta dma1$ , and  $\Delta dma1_{comp}$ . Lipids were relativized to an 18:0-20:4 phosphoinositol internal standard (IS). Red squares denote sphingolipids, dihydroceramides (DHC), ethanolamine-phosphoceramides (EPC), inositolphosphoceramide (IPC). Blue squares are phospholipids, phosphatidylethanolamine (PE), phosphatidylserine (PS), and phosphatidylinositol (PI). Yellow square represent amino lipids, glycyserine dipeptide lipids (GS), glycyserine phosphoryl diacylglycerol (GS-PA), N-(3-O-Acyl)acyl glycyserine phosphoryl dihydroceramide (GS-PDHC).

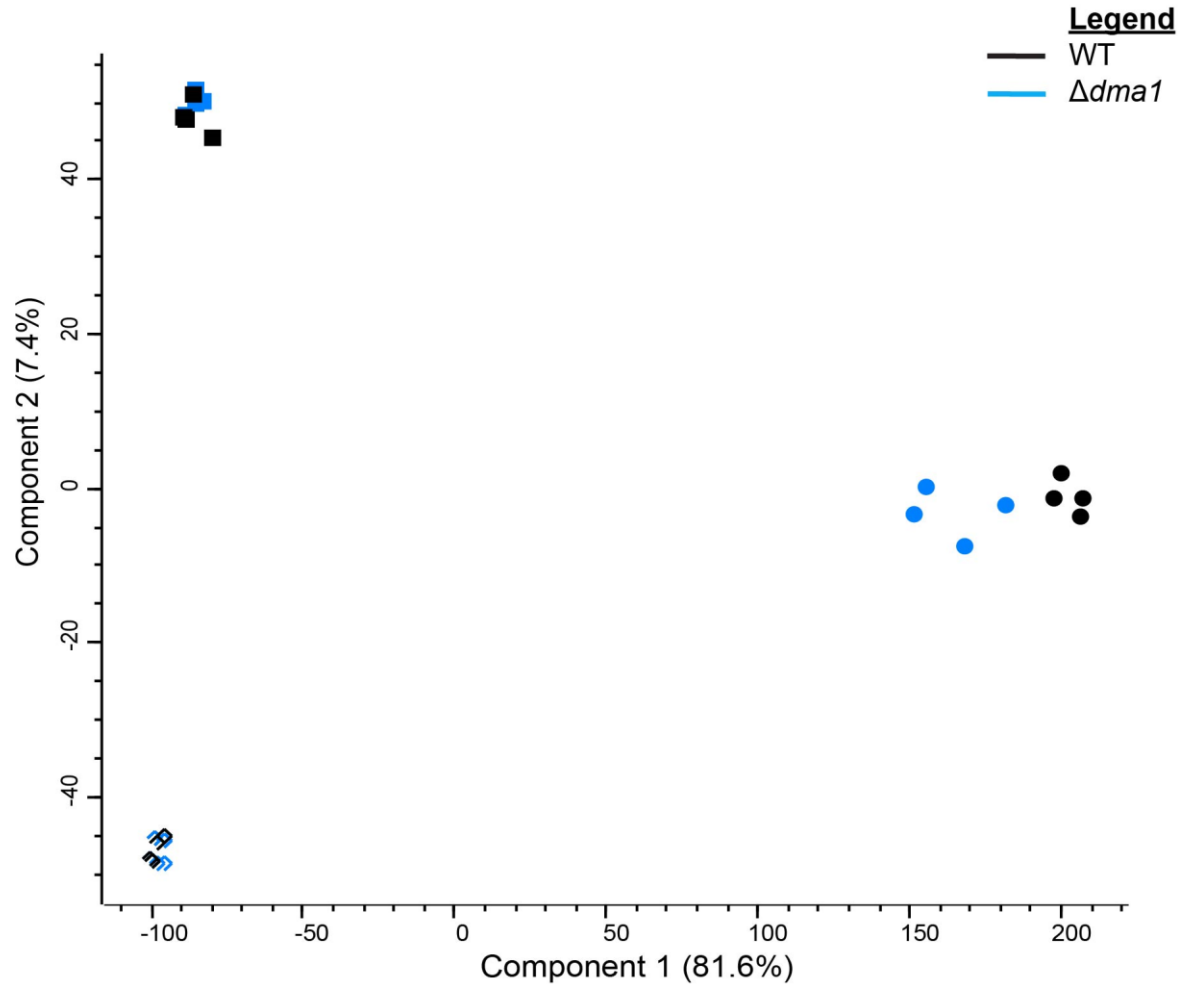

**Figure S5: Protein composition of subcellular fractions is consistent between the WT and  $\Delta dma1$ .** Principal component analysis (PCA) of WC (stars), TM (squares), and OMV (circles) proteomes from *Bt* grown in BHI media. Four biological replicates were performed for each condition.

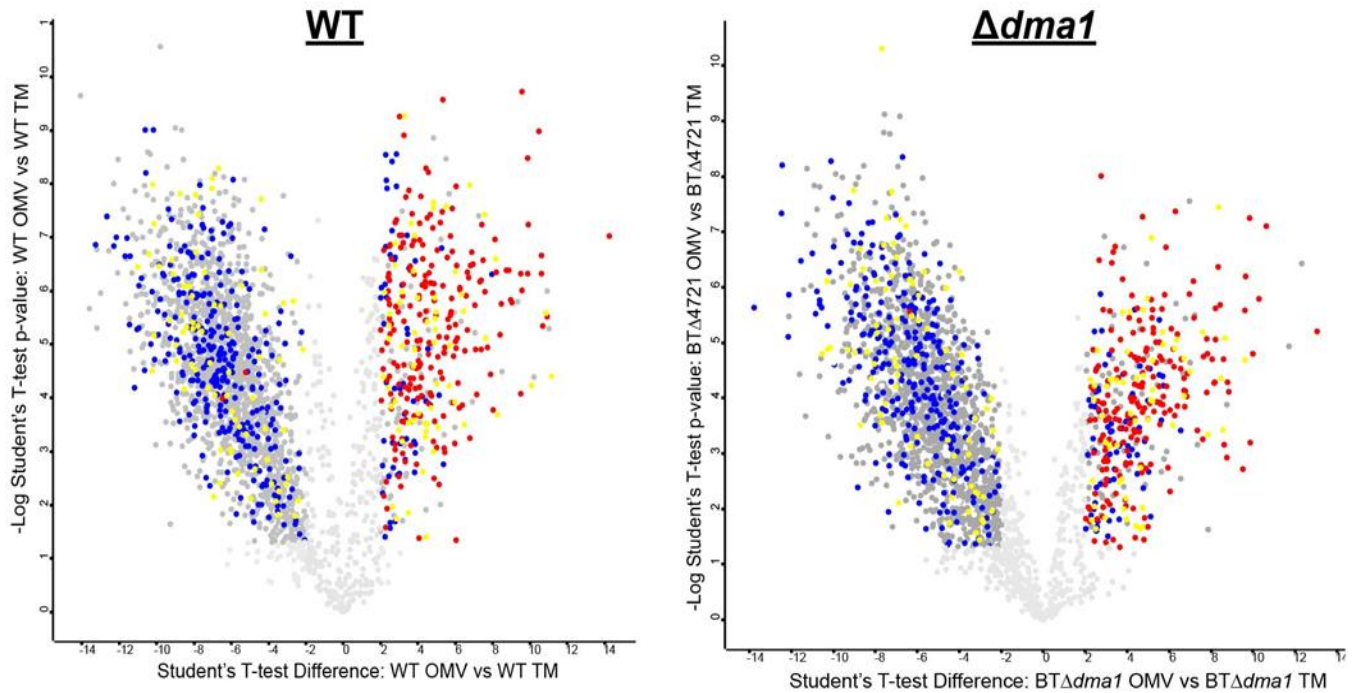

**Figure S6: OMV cargo selection is not impacted by mutation of Dma1.** Volcano plot representations of proteins enriched in the TM and OMV fractions. Integral membrane proteins are represented in blue, lipoproteins with LES motifs are indicated in red, lipoproteins lacking the LES motif are depicted in yellow, and soluble proteins are indicated in dark gray. (A) OMV cargo selection is maintained in  $\Delta dma1$ , indicating that these OMVs are not the result of cell lysis.

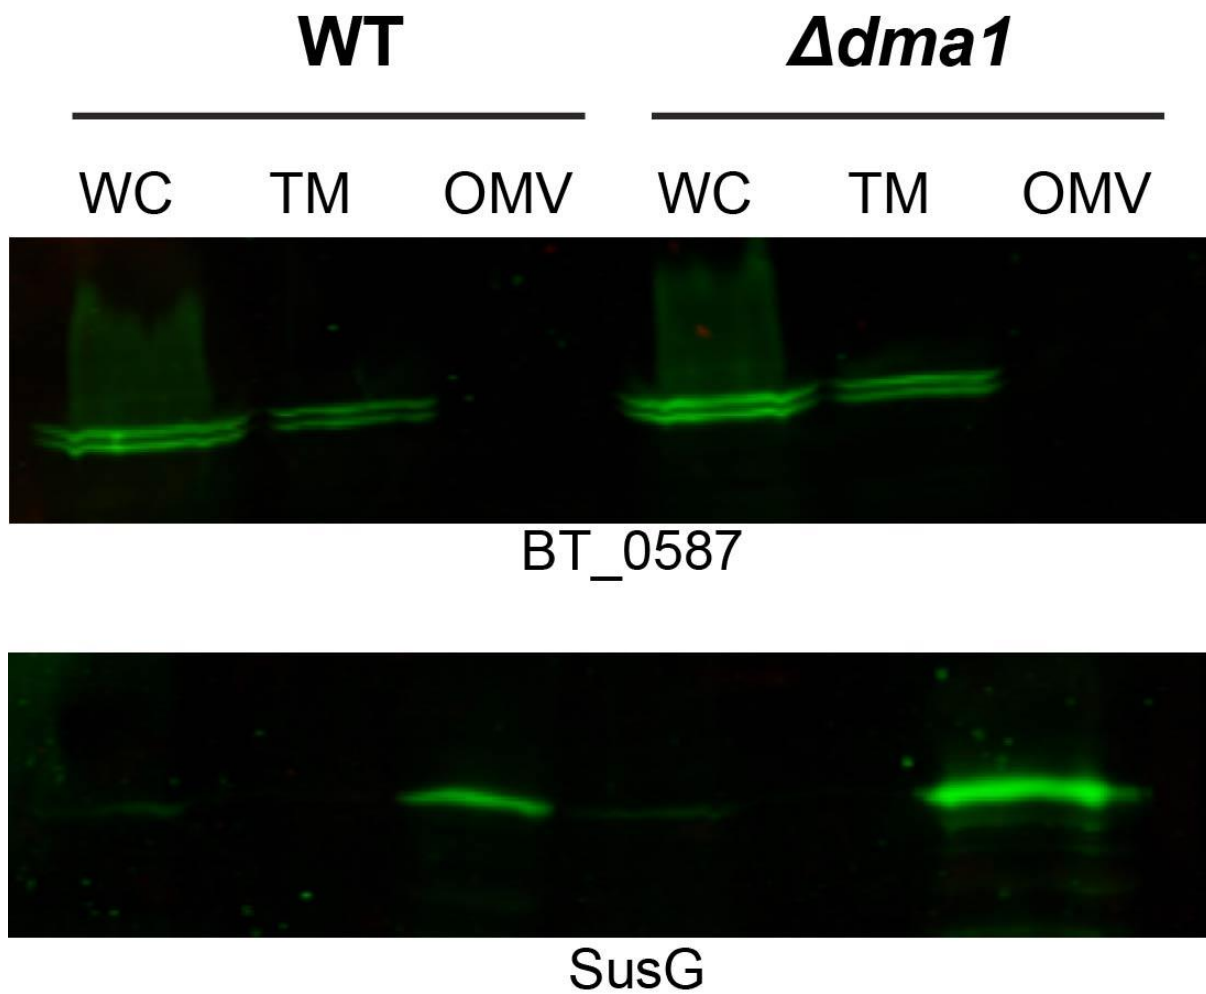

**Figure S7: Partitioning of OMV cargo is maintained in  $\Delta dma1$ .** Western blots using anti-polyHis against different membrane and OMV enriched proteins (*Top*: BT\_0587, *Bottom*: SusG (BT\_3698)). These demonstrate that partitioning of proteins between the OM and OMVs is not aberrant in  $\Delta dma1$ .



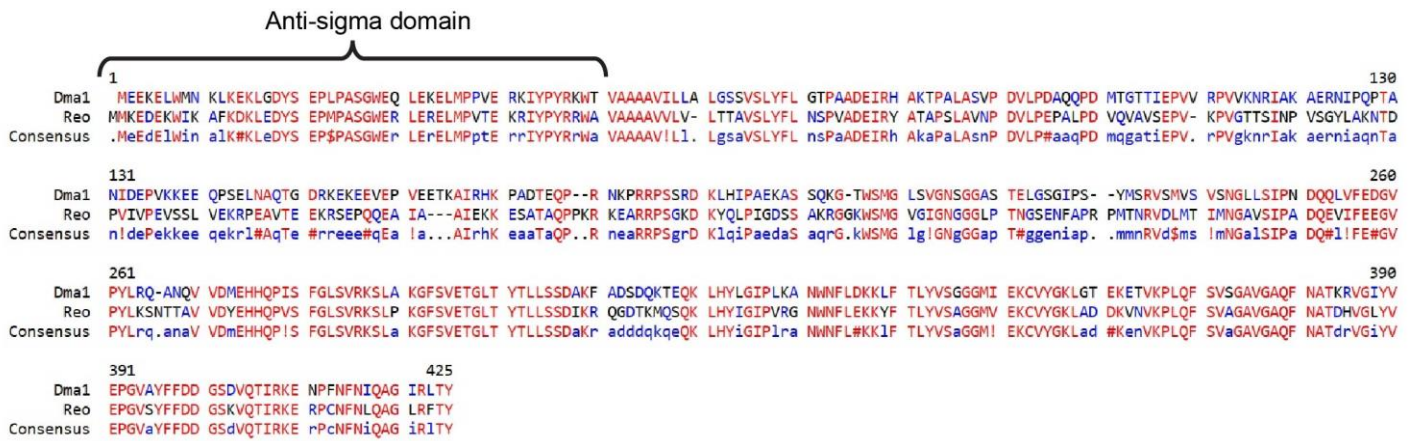

**Figure S8: Amino acid sequence alignment of Dma1 and Bf Reo.** Dma1 show 56% sequence identity with Reo. Amino acids highlighted in red represent high consensus levels (90%), while those in blue represent low consensus (50%). The predicted anti-sigma domain is shown in brackets. Alignment was done using MultAlin version 5.4.1.

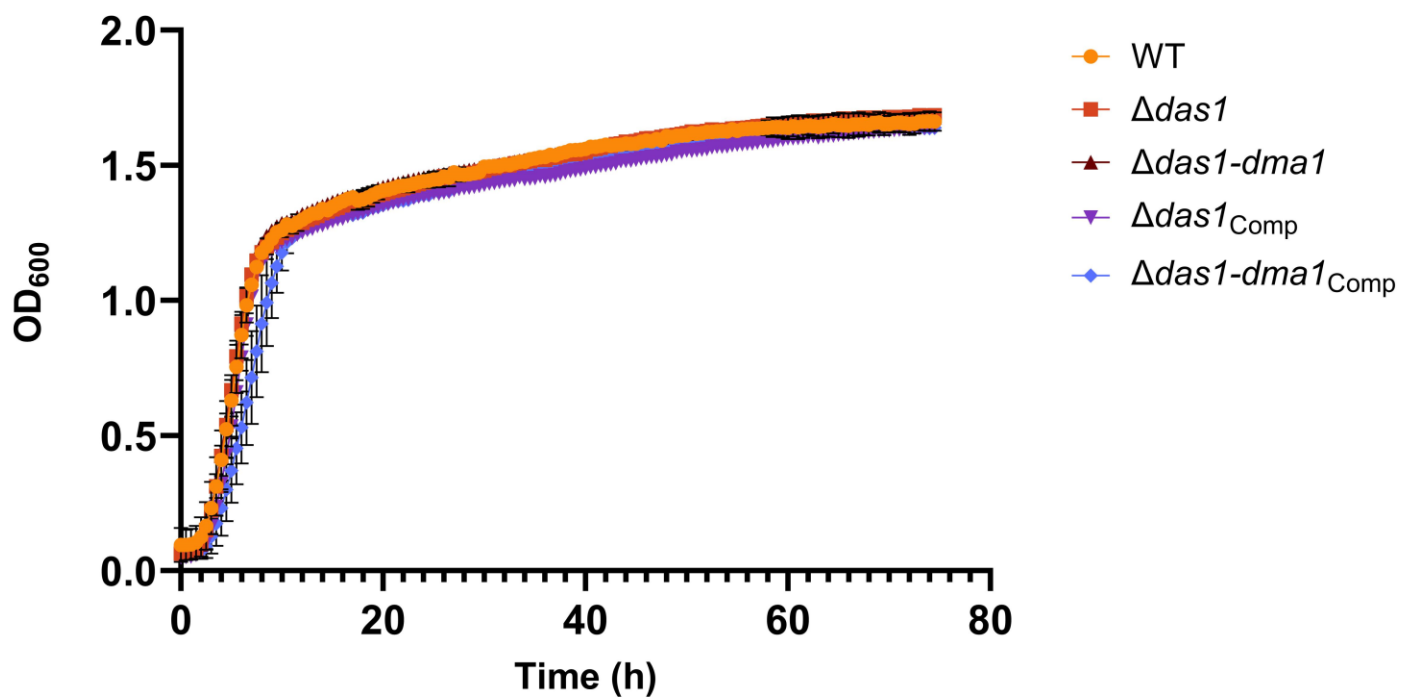

**Figure S9: Mutation of *das1* does not impact growth in the wild-type or  $\Delta dma1$  background *in vitro*.** Growth curves performed in BHI media for WT,  $\Delta das1$ ,  $\Delta das1-dma1$  and their corresponding complemented strain.

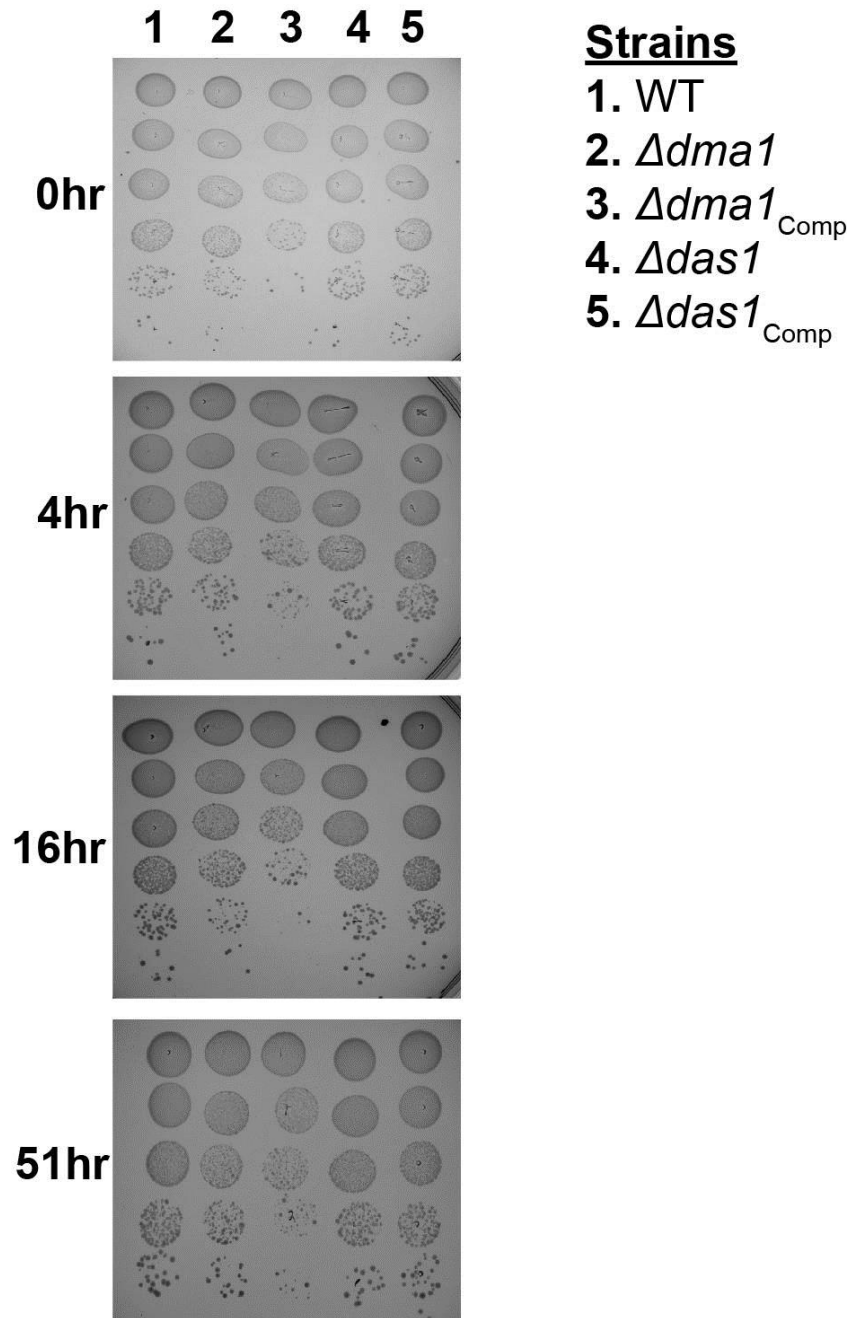

**Figure S10: Mutants in  $\Delta das1$  and  $\Delta dma1$  are not attenuated in aerobic stress.** Aerobic exposure stress tests comparing WT,  $\Delta das1$ ,  $\Delta dma1$ , and their corresponding complemented strains incubated in air for different times. Strains were cultured overnight, then diluted to the equivalent of  $OD_{600}=0.1$  for the initial spot. Each subsequent spot is a ten-fold dilution of the previous one.

**Table S3: RNA Sequencing- *Δdma1* Top 25 Most Upregulated Genes**

| Gene (New Locus Tag) | Gene (Old Locus Tag) | Log <sub>2</sub> FC | Padj       | Proposed Function                                            |
|----------------------|----------------------|---------------------|------------|--------------------------------------------------------------|
| BT_RS06495           | BT_1287              | 9.879633157         | 7.34E-26   | DUF4840 domain-containing protein                            |
| BT_RS20210           | BT_4005              | 7.986054337         | 2.34E-150  | NigD-like protein                                            |
| BT_RS23775           | BT_4719              | 7.743518851         | 1.26E-209  | NigD-like protein                                            |
| BT_RS16205           | NO                   | 5.229630823         | 3.24E-05   | Smalltalk protein                                            |
| BT_RS23780           | BT_4720              | 5.034076276         | 0          | Sigma-70 family RNA polymerase sigma factor                  |
| BT_RS19750           | BT_3913              | 4.044393237         | 1.72E-210  | DUF5034 domain-containing protein                            |
| BT_RS00870           | BT_0177              | 3.767930416         | 6.95E-285  | NigD-like protein                                            |
| BT_RS00875           | BT_0178              | 3.662030315         | 0          | YIP1 family protein                                          |
| BT_RS19755           | BT_3914              | 3.590716188         | 3.32E-192  | Hypothetical protein                                         |
| BT_RS11715           | BT_2315              | 3.579969558         | 0.0040536  | Hypothetical protein                                         |
| BT_RS24670           | NO                   | 3.287601612         | 0.02828646 | Hypothetical protein                                         |
| BT_RS05220           | BT_1038              | 3.178373436         | 2.30E-21   | endo-beta-N-acetylglucosaminidase family protein             |
| BT_RS20385           | BT_4039              | 3.177706063         | 1.72E-85   | TonB-dependent receptor                                      |
| BT_RS23805           | BT_4725              | 2.955721786         | 0.00240863 | RagB/SusD family nutrient uptake outer membrane protein      |
| BT_RS05230           | BT_1040              | 2.931638602         | 1.49E-67   | SusC/RagA family TonB-linked outer membrane protein          |
| BT_RS22810           | BT_4523              | 2.926352615         | 7.39E-155  | Type I restriction endonuclease EcoR124II                    |
| BT_RS14080           | BT_2779              | 2.860410832         | 2.41E-68   | Class I SAM-dependent methyltransferase                      |
| BT_RS10570           | BT_2086              | 2.691908858         | 1.37E-157  | Linear amide C-N hydrolase                                   |
| BT_RS05210           | BT_1036              | 2.653696133         | 4.33E-42   | DUF1735 domain-containing protein                            |
| BT_RS22805           | BT_4522              | 2.637320216         | 1.54E-52   | Type I restriction endonuclease                              |
| BT_RS05225           | BT_1039              | 2.5531964           | 1.13E-38   | SusD/RagB family nutrient-binding outer membrane lipoprotein |
| BT_RS22645           | BT_4490              | 2.541660806         | 1.52E-17   | DUF5025 domain-containing protein                            |
| BT_RS05215           | BT_1037              | 2.524779245         | 1.45E-28   | DUF1735 and LamG domain-containing protein                   |
| BT_RS12945           | BT_2560              | 2.50963332          | 8.48E-58   | TonB-dependent receptor                                      |
| BT_RS14845           | NO                   | 2.460763495         | 9.28E-08   | Smalltalk protein                                            |

**Table S3: RNA Sequencing-  $\Delta$ dma1 Top 25 Most Downregulated Genes**

| Gene (New Locus Tag) | Gene (Old Locus Tag) | Log <sub>2</sub> FC | Padj       | Proposed Function                                                |
|----------------------|----------------------|---------------------|------------|------------------------------------------------------------------|
| BT_RS22800           | BT_4521              | -3.0243084          | 5.47E-67   | Tyrosine-type recombinase/integrase                              |
| BT_RS15310           | BT_3017              | -2.497832498        | 0.01664662 | Acid phosphatase                                                 |
| BT_RS21860           | BT_4330              | -2.326456539        | 5.53E-127  | Nucleoside permease                                              |
| BT_RS09755           | BT_1926              | -2.295427189        | 5.78E-30   | OmpA/MotB domain protein                                         |
| BT_RS18675           | BT_3704              | -2.184786525        | 3.07E-33   | Glycoside hydrolase family 13 protein                            |
| BT_RS04750           | BT_0943              | -2.127262731        | 2.26E-53   | Penicillin-binding protein 2B (PBP-2B)                           |
| BT_RS13245           | BT_2619              | -2.123420723        | 1.05E-74   | Histidine kinase                                                 |
| BT_RS21840           | BT_4326              | -2.112073399        | 4.79E-98   | ATP-binding cassette domain-containing protein                   |
| BT_RS16435           | BT_3244              | -2.081737712        | 3.53E-50   | BACON domain-containing protein                                  |
| BT_RS04760           | BT_0945              | -2.078233418        | 3.80E-50   | Hypothetical protein                                             |
| BT_RS14350           | BT_2830              | -2.060239218        | 2.68E-70   | HU family DNA-binding protein                                    |
| BT_RS09760           | BT_1927              | -1.993238565        | 3.54E-41   | Hypothetical protein                                             |
| BT_RS16430           | BT_3243              | -1.909968855        | 4.73E-51   | DUF4302 domain-containing protein                                |
| BT_RS13240           | BT_2618              | -1.881918801        | 9.75E-09   | Two-component system response regulator                          |
| BT_RS20375           | BT_4037              | -1.872169035        | 1.38E-24   | Hypothetical protein                                             |
| BT_RS15060           | BT_2972              | -1.835815403        | 2.91E-23   | Class I SAM-dependent methyltransferase                          |
| BT_RS10930           | BT_2159              | -1.822844005        | 2.25E-148  | Gfo/ldh/MocA family oxidoreductase                               |
| BT_RS21835           | BT_4325              | -1.809901243        | 8.80E-74   | ABC transporter permease                                         |
| BT_RS08875           | BT_1751              | -1.805310189        | 2.07E-07   | Glycine betaine/L-proline ABC transporter ATP-binding protein    |
| BT_RS21845           | BT_4327              | -1.801115206        | 2.77E-108  | DUF4836 family protein                                           |
| BT_RS13230           | BT_2615              | -1.793091582        | 1.50E-07   | Group II intron reverse transcriptase/maturase                   |
| BT_RS04755           | BT_0944              | -1.791690553        | 3.24E-11   | Hypothetical protein                                             |
| BT_RS13260           | BT_2622              | -1.780022703        | 5.06E-84   | Alpha-glucuronidase                                              |
| BT_RS21850           | BT_4328              | -1.774306654        | 1.52E-76   | 16S rRNA (uracil(1498)-N(3))-methyltransferase                   |
| BT_RS10860           | BT_2145              | -1.764647845        | 2.52E-85   | Adenosylcobalamin-dependent ribonucleoside-diphosphate reductase |

**Table S4: Comparative Proteomics- *Adma1* Top 25 Most Upregulated Genes**

| Protein ID | Gene       | Fold Change | -Log(P-value) | Proposed Function                                          |
|------------|------------|-------------|---------------|------------------------------------------------------------|
| Q8A887     | BT_1287    | 9.30394     | 4.16088       | DUF4840 domain-containing protein                          |
| Q89YL2     | BT_4719    | 6.68855     | 2.84572       | NigD-like protein                                          |
| Q8A0L6     | BT_4005    | 5.17626     | 3.95591       | NigD-like protein                                          |
| Q89YS2     | BT_4659    | 3.50177     | 2.6692        | SusD homolog                                               |
| Q8AB86     | BT_0224    | 3.42438     | 1.96457       | Lipocalin-like protein                                     |
| Q8ABW9     | BT_p548229 | 3.19438     | 5.8735        | Fimbrillin family protein                                  |
| Q8A2W6     | BT_3189    | 3.012       | 1.91681       | Unknown                                                    |
| Q8ABX1     | BT_p548227 | 2.75674     | 1.99822       | DUF3575 domain-containing protein                          |
| Q8A8Q1     | BT_1116    | 2.7145      | 3.31          | PPC domain-containing protein                              |
| Q89Z34     | BT_4543    | 2.54599     | 3.24113       | Putative type I restriction enzyme specificity protein     |
| Q8A174     | BT_3792    | 2.47739     | 1.88394       | alpha-1,6-mannanase                                        |
| Q8A0W2     | BT_3909    | 2.1813      | 1.63533       | Unknown                                                    |
| Q8A2T3     | BT_3222    | 2.146       | 1.39245       | DUF4848 domain-containing protein                          |
| Q8A2T2     | BT_3223    | 2.05685     | 3.09966       | OMP_b-brl domain-containing protein                        |
| Q8A6W1     | BT_1765    | 1.85376     | 2.45838       | Levanase (2,6-beta-D-fructofuranosidase)                   |
| Q8A3A2     | BT_3052    | 1.82297     | 3.1166        | AraC family transcriptional regulator                      |
| Q8A8I7     | BT_1180    | 1.70579     | 1.8163        | Glycoside transferase family 4                             |
| Q8A0E0     | BT_4081    | 1.69799     | 1.36892       | SusC homolog                                               |
| Q8A113     | BT_3858    | 1.64563     | 1.41392       | Alpha-1,2-mannosidase                                      |
| Q8A9K1     | BT_0814    | 1.60821     | 1.70922       | BamA/TamA family outer membrane protein                    |
| Q8AB18     | BT_0294    | 1.60238     | 1.35371       | Carboxypeptidase regulatory-like domain-containing protein |
| Q8A5R5     | BT_2173    | 1.38299     | 1.42681       | SusD homolog                                               |
| Q8A151     | BT_3816    | 1.33909     | 1.3211        | Penicillin-binding protein 2 (PBP-2)                       |
| Q8AA46     | BT_0619    | 1.27055     | 1.6609        | Ion-translocating oxidoreductase complex subunit D, rnfD   |
| Q8A109     | BT_3862    | 1.18718     | 1.70627       | Endo-alpha-mannosidase                                     |

**Table S4: Comparative Proteomics- *Adma1* Top 25 Most Downregulated Genes**

| Protein ID | Gene    | Fold Change | -Log(P-value) | Proposed Function                                                  |
|------------|---------|-------------|---------------|--------------------------------------------------------------------|
| Q8A6F7     | BT_1927 | -5.75443    | 4.17785       | Unknown                                                            |
| Q8ABI4     | BT_0126 | -3.70228    | 1.44507       | Six-hairpin glycosidase                                            |
| Q8A4Y4     | BT_2463 | -3.65105    | 3.00365       | RNA polymerase ECF-type sigma factor                               |
| Q89ZQ0     | BT_4326 | -3.53782    | 2.86951       | ABC transporter ATP-binding protein                                |
| Q89ZP7     | BT_4329 | -2.97173    | 2.49205       | BFN domain-containing protein                                      |
| Q8A8X2     | BT_1045 | -2.64843    | 2.85322       | Concanavalin A-like lectin/glucanase                               |
| Q8A7D7     | BT_1587 | -2.61663    | 1.4901        | GCN5-related N-acetyltransferase                                   |
| Q8AAE0     | BT_0525 | -2.32145    | 1.32336       | LruC domain-containing protein                                     |
| Q8A826     | BT_1348 | -2.17801    | 2.67435       | CDP-abequose synthase                                              |
| Q89ZP8     | BT_4328 | -2.167      | 3.63516       | Ribosomal RNA small subunit methyltransferase E                    |
| Q89ZP9     | BT_4327 | -2.12513    | 5.58384       | DUF4836 family protein                                             |
| Q8A149     | BT_3818 | -1.95031    | 1.38383       | Gliding motility lipoprotein GldH                                  |
| Q89YQ4     | BT_4677 | -1.90211    | 2.01555       | Beta-lactamase-inhibitor-like PepSY-like domain-containing protein |
| Q8A5G3     | BT_2276 | -1.88136    | 1.51383       | AI-2E family transporter                                           |
| Q8A551     | BT_2391 | -1.74464    | 3.18011       | Hybrid Two-component system                                        |
| Q8A6C7     | BT_1957 | -1.70454    | 1.4706        | DUF4465 domain-containing protein                                  |
| Q8A8X3     | BT_1044 | -1.68106    | 3.56162       | Secreted endoglycosidase, GH family 18                             |
| Q8A4A5     | BT_2698 | -1.65411    | 1.42781       | Unknown                                                            |
| Q8AAL2     | BT_0452 | -1.63773    | 1.32215       | SusC homolog                                                       |
| Q89YP0     | BT_4691 | -1.59995    | 1.64528       | Ribosomal RNA large subunit methyltransferase F,rimF               |
| Q8A8X4     | BT_1043 | -1.59626    | 3.77015       | SusD homolog                                                       |
| Q8A6F8     | BT_1926 | -1.5911     | 1.87538       | OmpA/MotB domain protein                                           |
| Q8A5H2     | BT_2267 | -1.56716    | 1.5167        | Site-specific integrase                                            |
| Q8A2R4     | BT_3241 | -1.50727    | 1.30956       | SusD homolog                                                       |

| <b>Start Position</b> | <b>End Position</b> | <b>Sequence</b>          | <b>Posterior Error Probability</b> |
|-----------------------|---------------------|--------------------------|------------------------------------|
| 153                   | 164                 | EKEEVEPVEETK             | 1.62E-05                           |
| 187                   | 195                 | DKLHIPAEK                | 0.0033255                          |
| 189                   | 195                 | LHIPAEK                  | 0.038234                           |
| 259                   | 279                 | QANQVVDMEHHQPISFGLSVR    | 3.29E-14                           |
| 285                   | 302                 | GFSVETGLTYTLLSSDAK       | 1.01E-36                           |
| 314                   | 322                 | LHYLGIPLK                | 6.66E-06                           |
| 323                   | 330                 | ANWNFLDK                 | 0.0044146                          |
| 323                   | 331                 | ANWNFLDKK                | 2.04E-05                           |
| 356                   | 377                 | ETVKPLQFSVSGAVGAQFNATK   | 1.58E-09                           |
| 378                   | 401                 | RVGIYVEPGVAYFFDDGSDVQTIR | 4.09E-08                           |
| 379                   | 401                 | VGIYVEPGVAYFFDDGSDVQTIR  | 5.89E-08                           |
| 402                   | 415                 | KENPFNFNIQAGIR           | 6.49E-12                           |
| 403                   | 415                 | ENPFNFNIQAGIR            | 2.13E-09                           |

**Table S5: Tryptic peptides of Dma1 identified in the OMV fraction.**



**A.**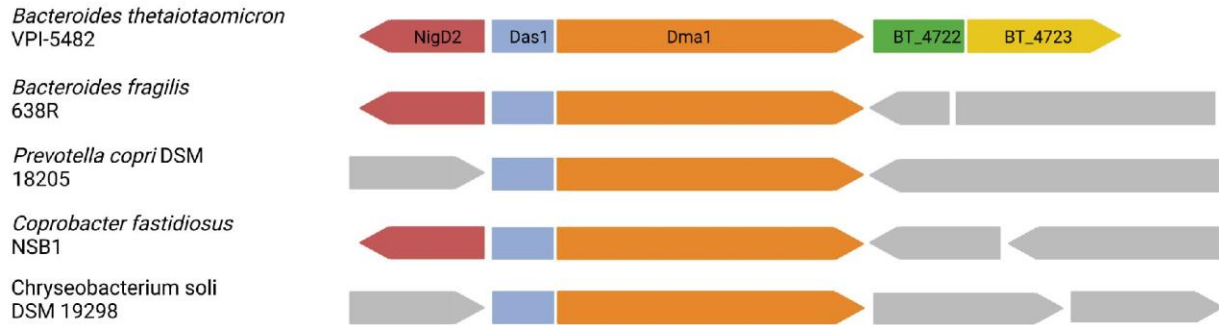**B.**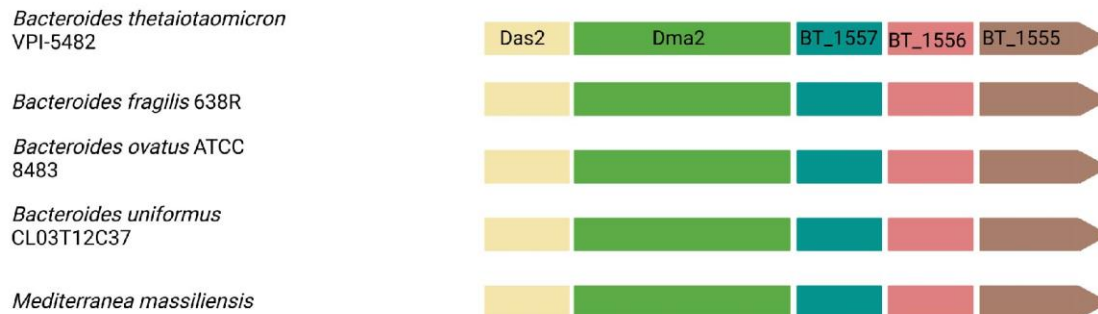**C.**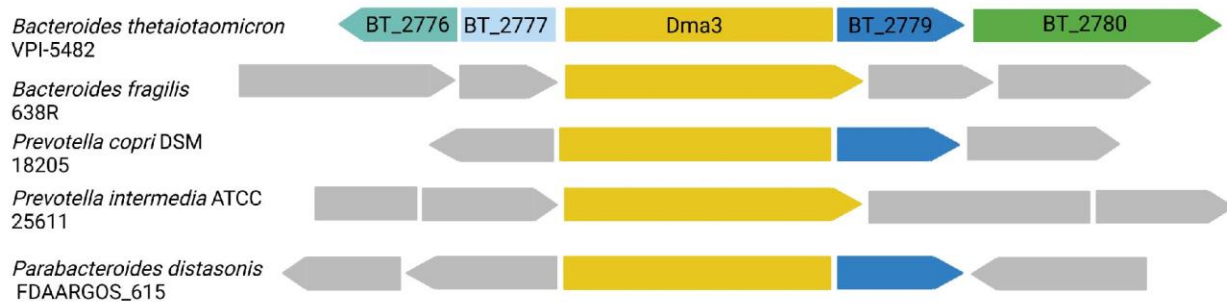

**Figure S11: Schematic of gene synteny of *Bt* Dma1-3.** Gene synteny for different Bacteroidota were compared to (A) Dma1 (BT\_4721), (B) Dma2 (BT\_1558), and (C) Dma3 (BT\_2778) from *Bt*. Genes of the same color are conserved in different species, while those in grey differ.

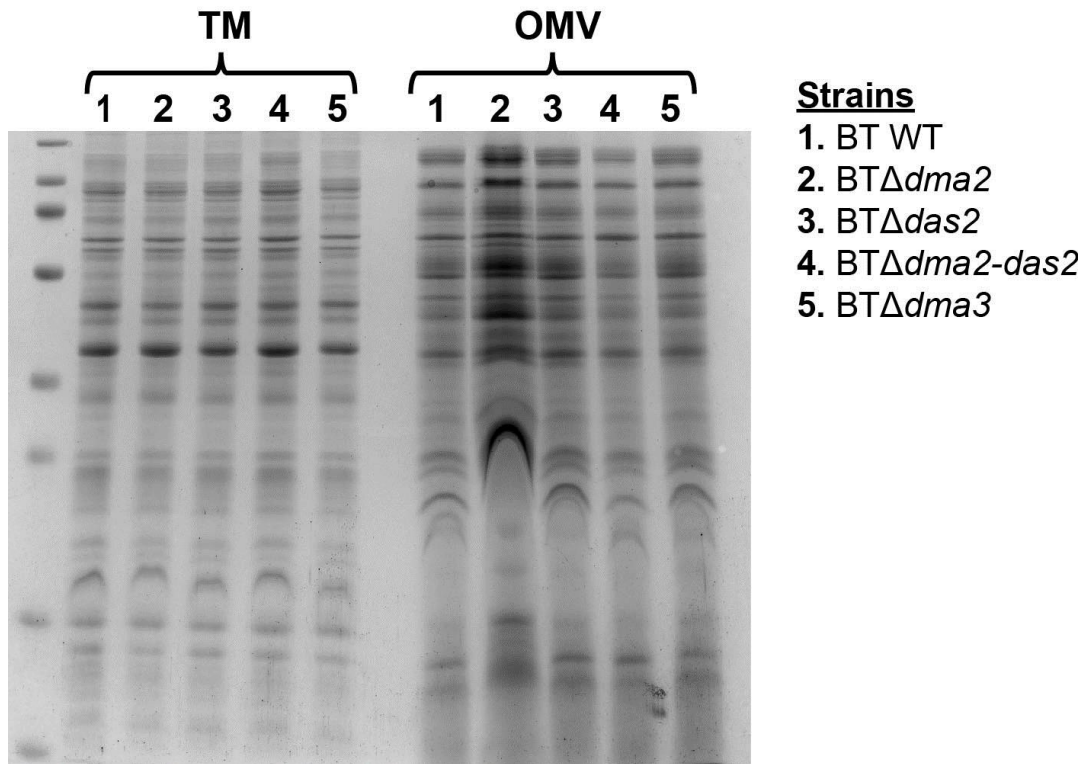

**Figure S12:  $\Delta$ *dma2* induces OMV biogenesis in a similar manner to  $\Delta$ *dma1*.** Coomassie Blue stain comparing protein profiles between WT,  $\Delta$ *dma2*,  $\Delta$ *das2*,  $\Delta$ *dma2-das2*, and  $\Delta$ *dma3*. This gel shows that mutation of *dma2* induces vesiculation, and this phenotype is dependent on its cognate sigma factor, Das2. Samples were normalized by OD<sub>600</sub> values and run on 10% SDS-PAGE gel.
